# Supplementary material
Source: PubMed Central journal article supplement (PMC7301858)
Supplement: AEM.00562-20-s0001.pdf [file AEM.00562-20-s0001.pdf]

Supplementary Figure 1: Estimated probability of presence of the Deferribacteres phylum at each time point

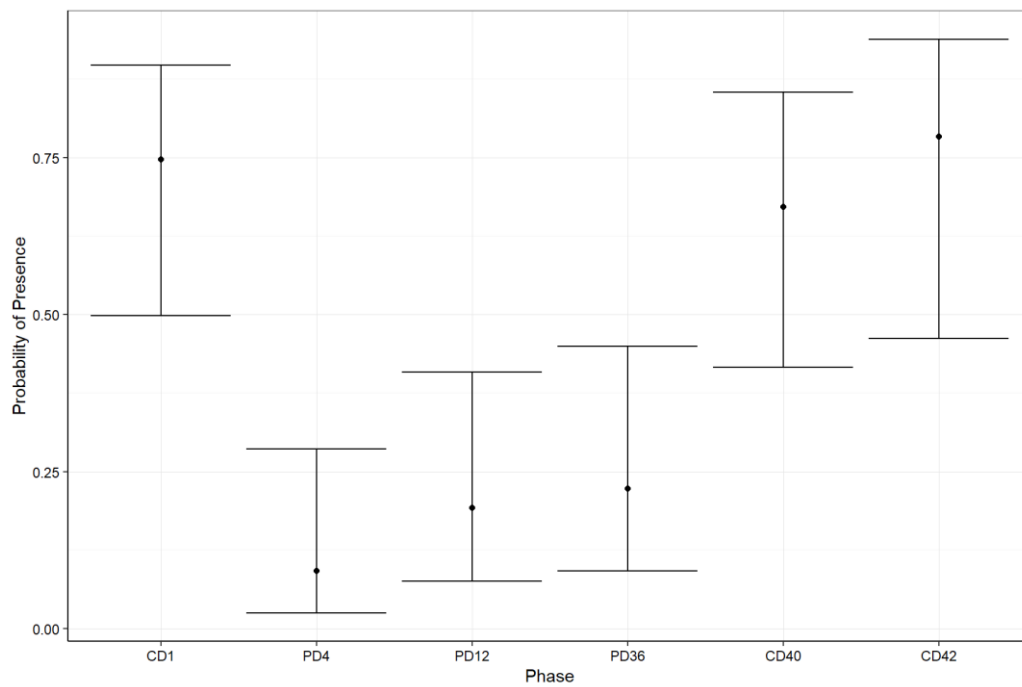

The Deferribacteres phylum, although only represented by a single OTU (Genus *Mucispirillum*), had the highest odds ratios between CD and PD phases. The presence of this OTU was analysed using a generalised linear mixed effects model with a binomial distribution and logit link. The response was an indicator of presence/absence (sequence count >0 or not), the fixed effect was phase and the random effect was dog. From this model probabilities of presence were estimated for all phases with 95% confidence intervals. These probabilities were compared between the average probability on the purified diet and the start and average end complex diet probabilities.
